# Supplementary material for: Phenolic Profile, Antioxidant Capacities and Enzymatic Inhibitory Activities of Propolis from Different Geographical Areas: Needs for Analytical Harmonization
Source: PubMed Central journal article supplement (PMC7022753; doi:10.3390/antiox9010075), 2020-01-15
Supplement: antioxidants-09-00075-s001.pdf [file antioxidants-09-00075-s001.pdf]

**Table S1.** Limit of detection and quantification of phenolic compounds (mg/mL) by HPLC-UV

| <b>Phenolic standard</b>   | <b>LD</b> | <b>LQ</b> |
|----------------------------|-----------|-----------|
| Gallic acid                | 0.0003    | 0.0009    |
| Caffeic acid               | 0.0003    | 0.0011    |
| Catechin                   | 0.0018    | 0.0060    |
| Clorogenic acid            | 0.0001    | 0.0043    |
| p-Coumaric acid            | 0.0005    | 0.0018    |
| Ferulic acid               | 0.0013    | 0.0044    |
| Naringenin +<br>Quercetin* | 0.0007    | 0.0025    |
| Apigenin +<br>Kaempferol*  | 0.0017    | 0.0059    |
| Pinocembrin                | 0.0013    | 0.0044    |
| CAPE + Galangin*           | 0.0049    | 0.0163    |

**Table S2.** Antioxidant activity against ABTS<sup>•+</sup> radical ( $\mu\text{mol Trolox/g}$ ) of standard phenolic compounds

| Samples         | $\mu\text{mol T/g}$ |
|-----------------|---------------------|
| Gallic acid     | 24173 $\pm$ 523     |
| Caffeic acid    | 6503 $\pm$ 237      |
| Catechin        | 5772 $\pm$ 129      |
| Clorogenic acid | 2380 $\pm$ 29       |
| p-Coumaric acid | 374 $\pm$ 7         |
| Ferulic acid    | 7507 $\pm$ 66       |
| Quercetin       | 5852 $\pm$ 89       |
| Naringenin      | 20 $\pm$ 0.2        |
| Kaempferol      | 4270 $\pm$ 12.9     |
| Apigenin        | 43 $\pm$ 2.3        |
| Pinocembrin     | 15 $\pm$ 0.4        |
| Galangin        | 2697 $\pm$ 99       |
| CAPE            | 3530 $\pm$ 231      |

**Table S3.** TEAC values ( $\mu\text{mol Trolox/g}$ ) of the propolis samples calculated from the addition of the TEAC contribution of each phenolic compound quantified by HPLC-UV, and actual TEAC values of the propolis samples.

| <b>Propolis samples</b> | <b>Estimated range for TEAC according to phenolic composition by HPLC (<math>\mu\text{mol T/g}</math>)</b> | <b>Actual TEAC (<math>\mu\text{mol T/g}</math>)</b> |
|-------------------------|------------------------------------------------------------------------------------------------------------|-----------------------------------------------------|
| 1                       | 305-339                                                                                                    | 398                                                 |
| 2                       | 214-289                                                                                                    | 453                                                 |
| 3                       | 113-185                                                                                                    | 468                                                 |
| 4                       | 286-303                                                                                                    | 427                                                 |
| 5                       | 266-345                                                                                                    | 426                                                 |
| 6                       | 363-374                                                                                                    | 363                                                 |
| 7                       | 70-126                                                                                                     | 466                                                 |
| 8                       | 147-164                                                                                                    | 280                                                 |
| 9                       | 225-259                                                                                                    | 465                                                 |
| 10                      | 84-124                                                                                                     | 467                                                 |
| 11                      | 317-431                                                                                                    | 466                                                 |
| 12                      | 93-242                                                                                                     | 466                                                 |
| 13                      | 360-471                                                                                                    | 470                                                 |
